# Supplementary material for: Genome-Wide Identification of Molecular Pathways and Biomarkers in Response to Arsenic Exposure in Zebrafish Liver
Source: PubMed Central journal article supplement (PMC3726666; doi:10.1371/journal.pone.0068737), 2013-07-29
Supplement: pone.0068737.s001.pdf [file pone.0068737.s001.pdf]

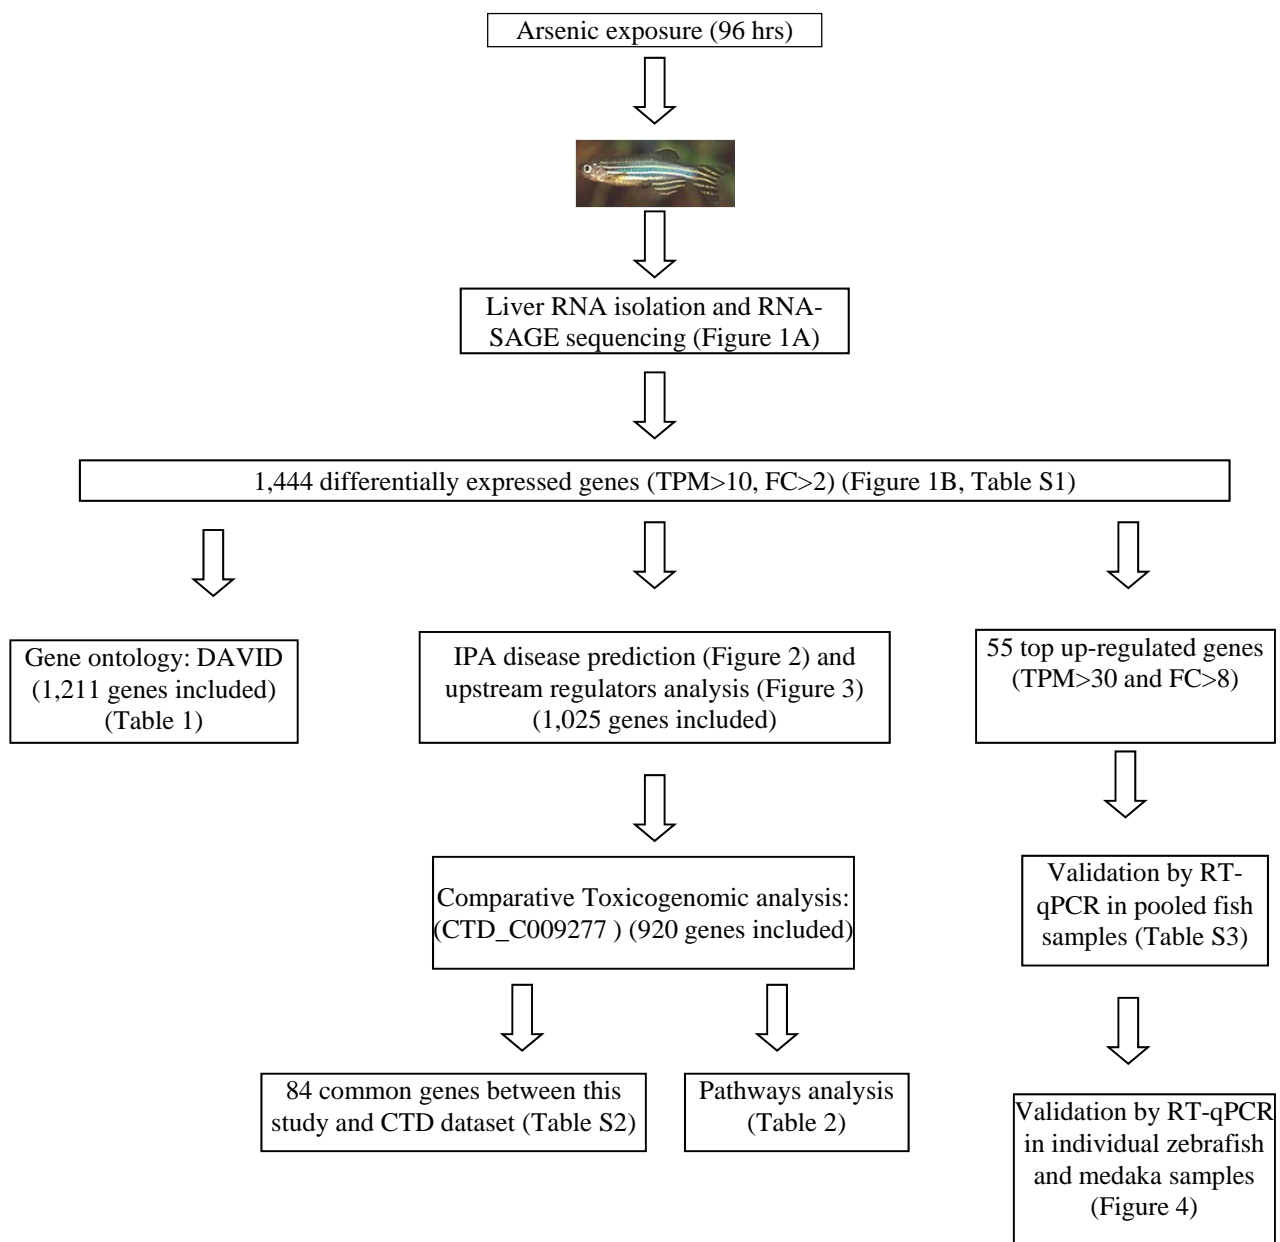

**Figure S1. Flowchart of the study.** Main steps and analyses are represented in each box in chronological order. Data generated from these analyses are shown in figures and tables as indicated in each box.
